# Supplementary material for: Optimization of a lipase/reduced graphene oxide/metal–organic framework electrode using a central composite design-response surface methodology approach
Source: Royal Society of Chemistry journal article supplement (doi:10.1039/d3ra01060k), 2023-01-01
Supplement: d3ra01060k1.pdf [file d3ra01060k1.pdf]

Supplementary material for

**Optimization of a Lipase/Reduced Graphene Oxide/Metal-Organic Framework  
Electrode using Central Composite Design-Response Surface Methodology Approach**

Nur Aina Izzati Mohd Mokhtar<sup>1</sup>, Siti Efliza Ashari<sup>2,3</sup>, Ruzniza Mohd Zawawi<sup>1,\*</sup>

<sup>1</sup>*Department of Chemistry, Faculty of Science, Universiti Putra Malaysia, 43400 UPM,  
Serdang, Selangor, Malaysia*

<sup>2</sup>*Integrated Chemical BioPhysics Research, Faculty of Science, Universiti Putra Malaysia,  
43400 UPM, Serdang, Selangor, Malaysia*

<sup>3</sup>*Centre of Foundation Studies for Agricultural Sciences, Universiti Putra Malaysia, 43400  
UPM, Serdang, Selangor, Malaysia*

*\*Corresponding author: ruzniza@upm.edu.my*

**Table S1** The experimental runs with the actual and predicted current response obtained from RSM model

| Run       | Parameters         |                               |                                 | Current response ( $\mu\text{A}$ ) |           |
|-----------|--------------------|-------------------------------|---------------------------------|------------------------------------|-----------|
|           | A: rGO weight (mg) | B: Ultrasonication time (min) | C: Lipase concentration (mg/mL) | Actual                             | Predicted |
| <b>1</b>  | 1.5 (0)            | 45 (0)                        | 20 (0)                          | 98.79                              | 100.55    |
| <b>2</b>  | 1 (-1)             | 45 (0)                        | 20 (0)                          | 105.6                              | 104.6     |
| <b>3</b>  | 1.5 (0)            | 45 (0)                        | 20 (0)                          | 100.31                             | 100.55    |
| <b>4</b>  | 1 (-1)             | 30 (-1)                       | 10 (-1)                         | 101.59                             | 102.07    |
| <b>5</b>  | 1.5 (0)            | 45 (0)                        | 30 (+1)                         | 112.36                             | 111.43    |
| <b>6</b>  | 2 (+1)             | 30 (-1)                       | 30 (+1)                         | 113.38                             | 113.83    |
| <b>7</b>  | 2 (+1)             | 60 (+1)                       | 10 (-1)                         | 103.78                             | 103.56    |
| <b>8</b>  | 2 (+1)             | 30 (-1)                       | 10 (-1)                         | 101.73                             | 101.59    |
| <b>9</b>  | 1 (-1)             | 60 (+1)                       | 30 (+1)                         | 112.03                             | 112.37    |
| <b>10</b> | 1.5 (0)            | 45 (0)                        | 20 (0)                          | 99.71                              | 100.55    |
| <b>11</b> | 1 (-1)             | 30 (-1)                       | 30 (+1)                         | 116.93                             | 117.35    |
| <b>12</b> | 1 (-1)             | 60 (+1)                       | 10 (-1)                         | 104.35                             | 104.10    |
| <b>13</b> | 1.5 (0)            | 45 (0)                        | 20 (0)                          | 100.26                             | 100.55    |
| <b>14</b> | 2 (+1)             | 45 (0)                        | 20 (0)                          | 102.36                             | 102.56    |
| <b>15</b> | 1.5 (0)            | 30 (-1)                       | 20 (0)                          | 101.13                             | 99.92     |
| <b>16</b> | 1.5 (0)            | 45 (0)                        | 20 (0)                          | 100.52                             | 100.55    |
| <b>17</b> | 1.5 (0)            | 45 (0)                        | 10 (-1)                         | 101.04                             | 101.17    |
| <b>18</b> | 1.5 (0)            | 60 (+1)                       | 20 (0)                          | 98.01                              | 98.42     |
| <b>19</b> | 2 (+1)             | 60 (+1)                       | 30 (+1)                         | 109.07                             | 108.79    |

---

|           |         |        |        |        |        |
|-----------|---------|--------|--------|--------|--------|
| <b>20</b> | 1.5 (0) | 45 (0) | 20 (0) | 102.08 | 100.55 |
|-----------|---------|--------|--------|--------|--------|

---

**Table S2** The regression coefficient estimate results

| Variable                          | Coefficient estimate |
|-----------------------------------|----------------------|
| Standard deviation                | 1.04                 |
| Mean                              | 104.25               |
| Coefficient of variation (C.V.) % | 0.9955               |
| R <sup>2</sup>                    | 0.9812               |
| Adjusted R <sup>2</sup>           | 0.9642               |
| Predicted R <sup>2</sup>          | 0.9235               |
| Adequate precision                | 25.8022              |

**Table S3** The constraints for the independent parameters and the output

| Parameters (unit)            | Goal     | Lower Limit | Upper Limit |
|------------------------------|----------|-------------|-------------|
| rGO weight (mg)              | In range | 1           | 2           |
| Ultrasonication time (min)   | In range | 30          | 60          |
| Lipase concentration (mg/mL) | In range | 10          | 30          |
| Current ( $\mu$ A)           | Maximize | 98.01       | 116.93      |

**Table S4** The validation set of the lipase/rGO/Cu-MOF/SPCE

| Sample | Independent Variables |                                   |                                        | Current Response ( $\mu\text{A}$ ) |                       | Residual                       |
|--------|-----------------------|-----------------------------------|----------------------------------------|------------------------------------|-----------------------|--------------------------------|
|        | rGO weight<br>(mg)    | Ultrasonicati<br>on time<br>(min) | Lipase<br>concentrati<br>on<br>(mg/mL) | Predicted                          | Actual                | Standard<br>Error %<br>(RSE %) |
| 1      | 1                     | 30                                | 20                                     | 103.959                            | 103.883 $\pm$<br>1.29 | 0.073                          |
| 2      | 1.5                   | 30                                | 10                                     | 98.795                             | 100.230 $\pm$<br>3.25 | 1.453                          |
| 3      | 1.5                   | 60                                | 10                                     | 100.796                            | 101.395 $\pm$<br>2.47 | 0.594                          |
| 4      | 1.5                   | 30                                | 30                                     | 112.556                            | 112.540 $\pm$<br>1.08 | 0.014                          |
| 5      | 1.5                   | 60                                | 30                                     | 107.547                            | 109.390 $\pm$<br>0.72 | 1.714                          |

**Table S5** Percentage area of the secondary structure of free lipase and lipase/rGO/Cu-MOF

| Sample                | Area (%)          |                 |                |                    |                    |
|-----------------------|-------------------|-----------------|----------------|--------------------|--------------------|
|                       | $\alpha$ -helices | $\beta$ -sheets | $\beta$ -turns | Turns and<br>bands | Unordered<br>coils |
| Free lipase           | 14.32             | 37.57           | 21.80          | 11.78              | 14.53              |
| Lipase/rGO/<br>Cu-MOF | 35.60             | 27.79           | 23.94          | 5.12               | 7.55               |

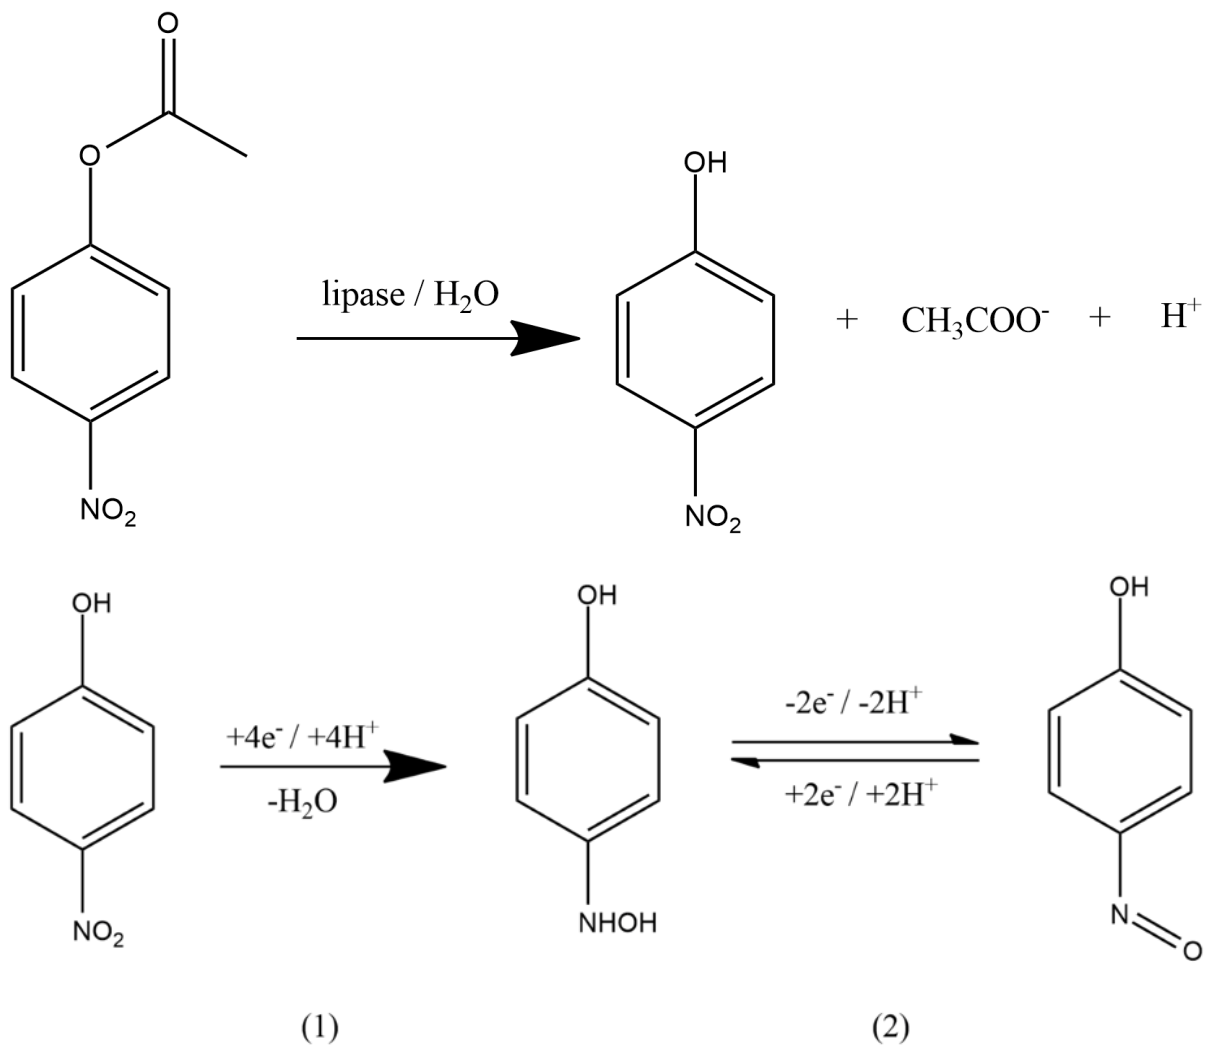

**Scheme S1** The mechanisms of p-NPA detection using lipase



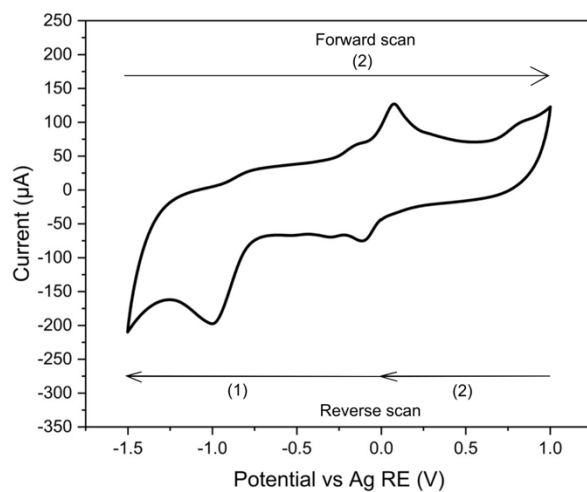

**Fig. S1** Cyclic voltammogram of 750  $\mu\text{M}$  p-NPA in 0.1 M PBS (pH 7) using lipase/rGO/Cu-MOF/SPCE at a scan rate of 100 mV/s

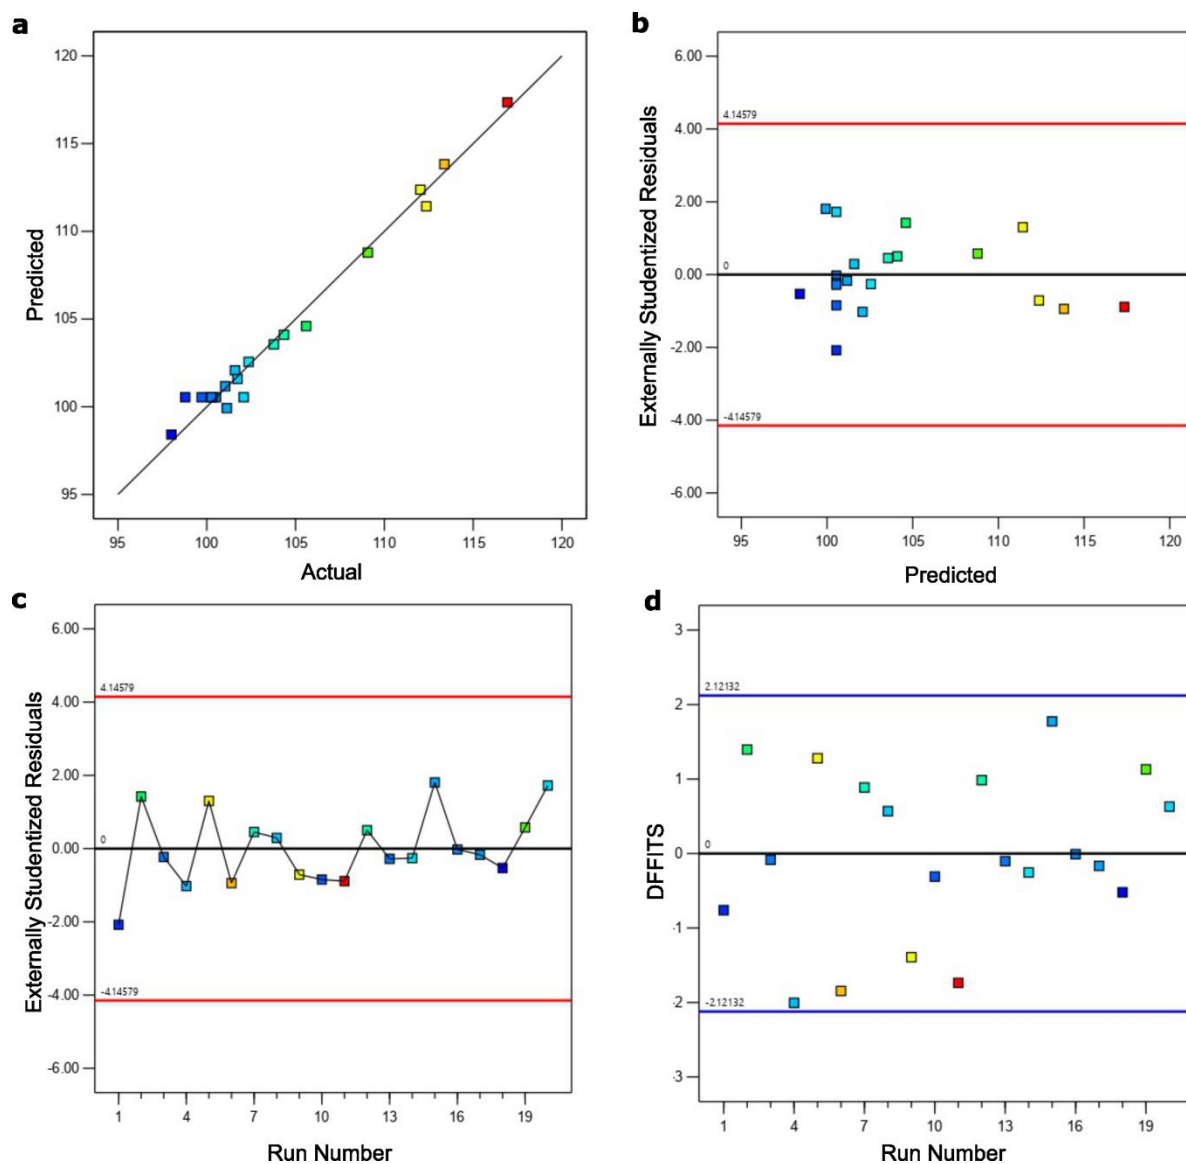

**Fig. S2** The diagnostic plots for the electrode optimization. The predicted versus actual response plot (a), the externally studentized residuals response versus the predicted current response plot (b), the studentized residuals response versus run number plot (c), and the DFFITS experimental run versus the run number plot (d)

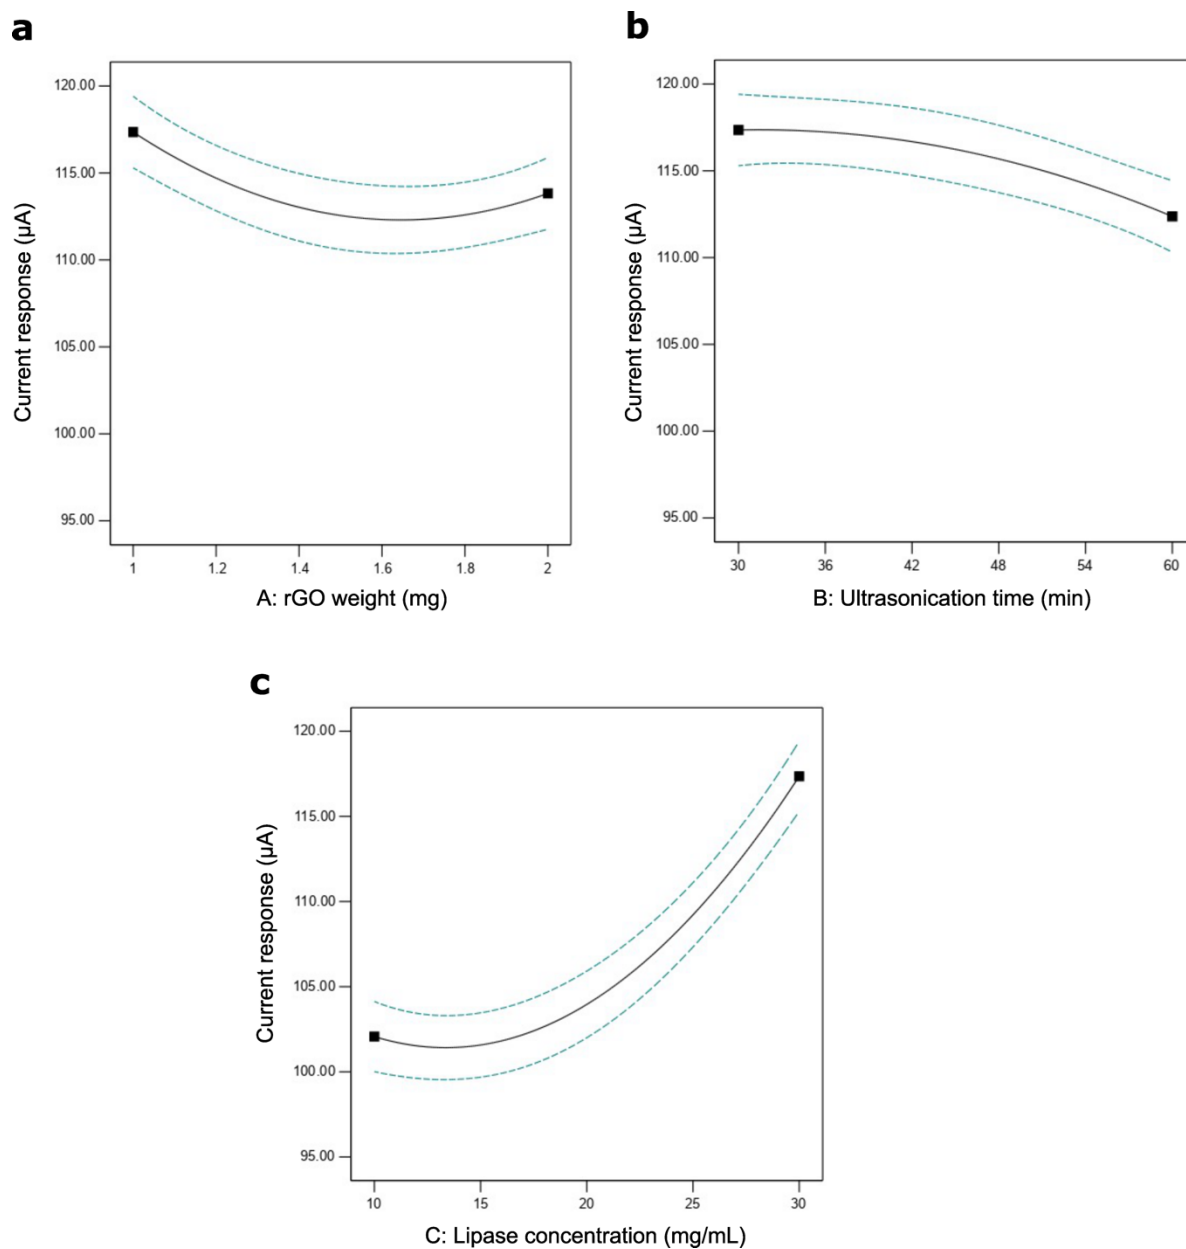

**Fig. S3** The effect of rGO weight (a), ultrasonication time (b), and lipase concentration (c) on the current response. The dotted lines represent the 95% confidence limit

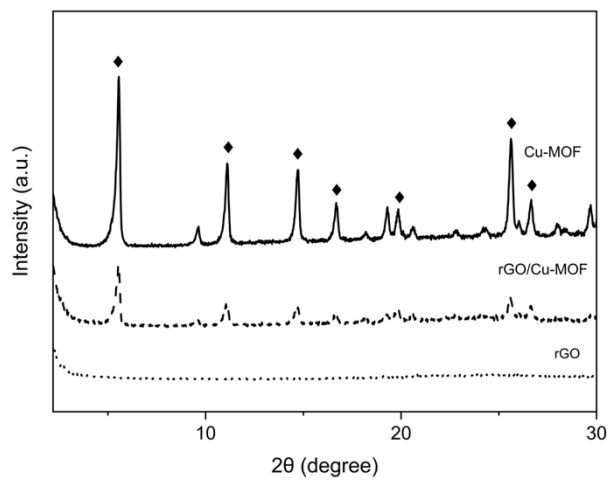

**Fig. S4** XRD diffractograms of Cu-MOF, rGO/Cu-MOF, and rGO (the ◆ symbol indicating peak corresponding to Cu-MOF structure)
